# Supplementary material for: N6-methyladenosine (m6A) reader IGF2BP1 facilitates clear-cell renal cell carcinoma aerobic glycolysis
Source: PeerJ journal article supplement (doi:10.7717/peerj.14591), 2023-01-18
Supplement: raw_data.zip [file raw_data.zip]

## Sheet: Sheet1
						LDHA mRNA					△CT				△△CT				2-△△CT			* 100%
shNC	0 hour	18.318	18.324	18.464		22.498	22.456	22.458		4.18	4.132	3.994	4.102	0.078	0.03	-0.108		0.94737	0.97942	1.07773		94.737	97.942	107.773
	3 hour	18.532	18.468	18.357		23.327	23.206	22.786		4.795	4.738	4.429		0.615	0.606	0.435		0.65293	0.657016	0.739694		65.293	65.7016	73.9694
	6 hour	18.465	18.675	18.645		23.913	24.195	24.227		5.448	5.52	5.582		1.268	1.388	1.588		0.415235	0.382094	0.332632		41.5235	38.2094	33.2632
						LDHA mRNA					△CT				△△CT				2-△△CT
shIGF2BP1	0 hour	18.474	18.366	18.557		22.485	22.298	22.368		4.011	3.932	3.811	3.918	0.093	0.014	-0.107		0.937571	0.990343	1.07699		93.7571	99.0343	107.699
	3 hour	18.746	18.578	18.465		23.777	23.156	23.142		5.031	4.578	4.677		1.02	0.646	0.866		0.493116	0.63905	0.548666		49.3116	63.905	54.8666
	6 hour	18.397	18.598	18.366		24.515	24.474	24.318		6.118	5.876	5.952		2.107	1.944	2.141		0.232129	0.259895	0.226723		23.2129	25.9895	22.6723
						LDHA mRNA					△CT				△△CT				2-△△CT			* 100%
oeNC	0 hour	18.675	18.751	18.766		22.235	22.125	22.235		3.56	3.374	3.469	3.46767	0.0923333	-0.0936667	0.00133333		0.938004	1.06708	0.999076		93.8004	106.708	99.9076
	3 hour	18.547	18.524	18.487		22.935	22.625	22.754		4.388	4.101	4.267		0.828	0.727	0.798		0.56331	0.604159	0.575146		56.331	60.4159	57.5146
	6 hour	18.476	18.387	18.502		23.842	23.326	23.556		5.366	4.939	5.054		1.806	1.565	1.585		0.285983	0.337978	0.333325		28.5983	33.7978	33.3325
						LDHA mRNA					△CT				△△CT				2-△△CT
oeIGF2BP1	0 hour	18.255	18.275	18.307		22.267	22.536	22.406		4.012	4.261	4.099	4.124	-0.112	0.137	-0.025		1.08073	0.909408	1.01748		108.073	90.9408	101.748
	3 hour	18.654	18.287	18.376		23.191	22.966	22.924		4.537	4.679	4.548		0.525	0.418	0.449		0.694959	0.748461	0.73255		69.4959	74.8461	73.255
	6 hour	18.726	18.765	18.252		23.744	24.054	23.466		5.018	5.289	5.214		1.006	1.028	1.115		0.497925	0.49039	0.461691		49.7925	49.039	46.1691
