# Supplementary material for: N6-methyladenosine (m6A) reader IGF2BP1 facilitates clear-cell renal cell carcinoma aerobic glycolysis
Source: PeerJ journal article supplement (doi:10.7717/peerj.14591), 2023-01-18
Supplement: uncropped_blot.zip [file uncropped_blot.zip]

bits

2

1

0

1

2

3

4

5

6

7

C

C

C

C

C

C

C

U

U

U

U

U

U

U

G

G

A

C

G

A
