# Supplementary figures and images for: N6-methyladenosine (m6A) reader IGF2BP1 facilitates clear-cell renal cell carcinoma aerobic glycolysis
Source: PeerJ journal article supplement (doi:10.7717/peerj.14591), 2023-01-18

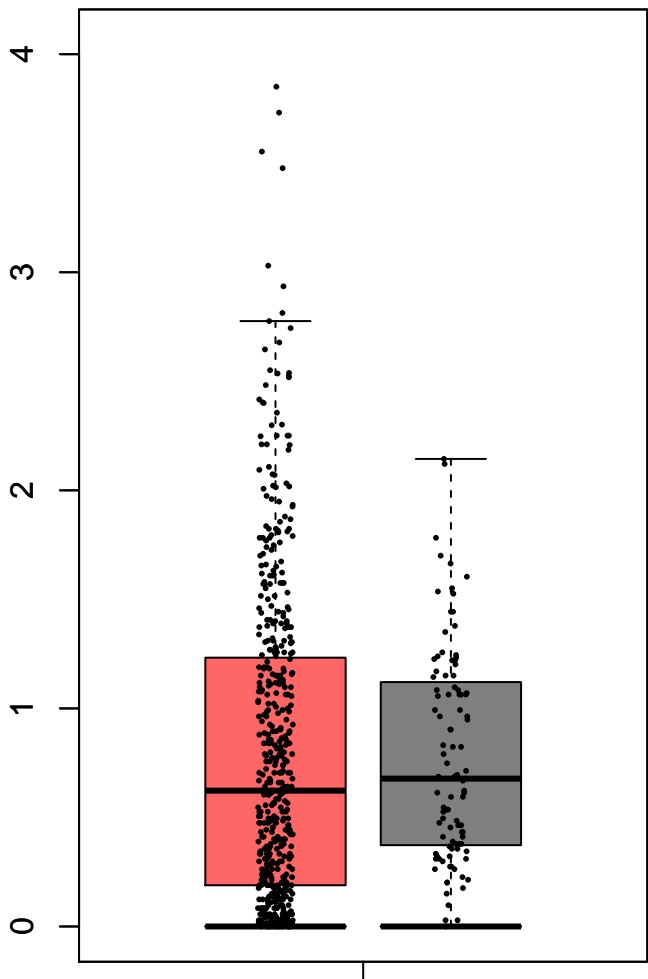

KIRC  
(num(T)=523; num(N)=100)

Supplement: uncropped_blot.zip [file uncropped_blot.zip]

# Overall Survival

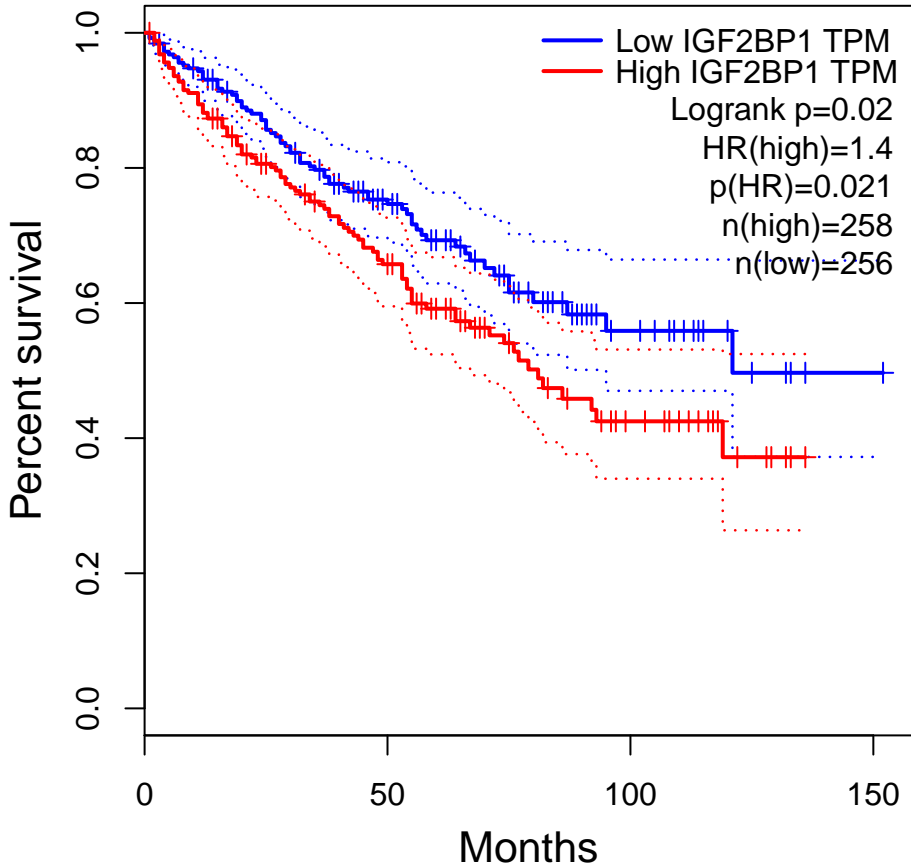

Supplement: uncropped_blot.zip [file uncropped_blot.zip]

p-value =  $8.7\text{e-}05$   
R = 0.17

log2(IGF2BP1 TPM)

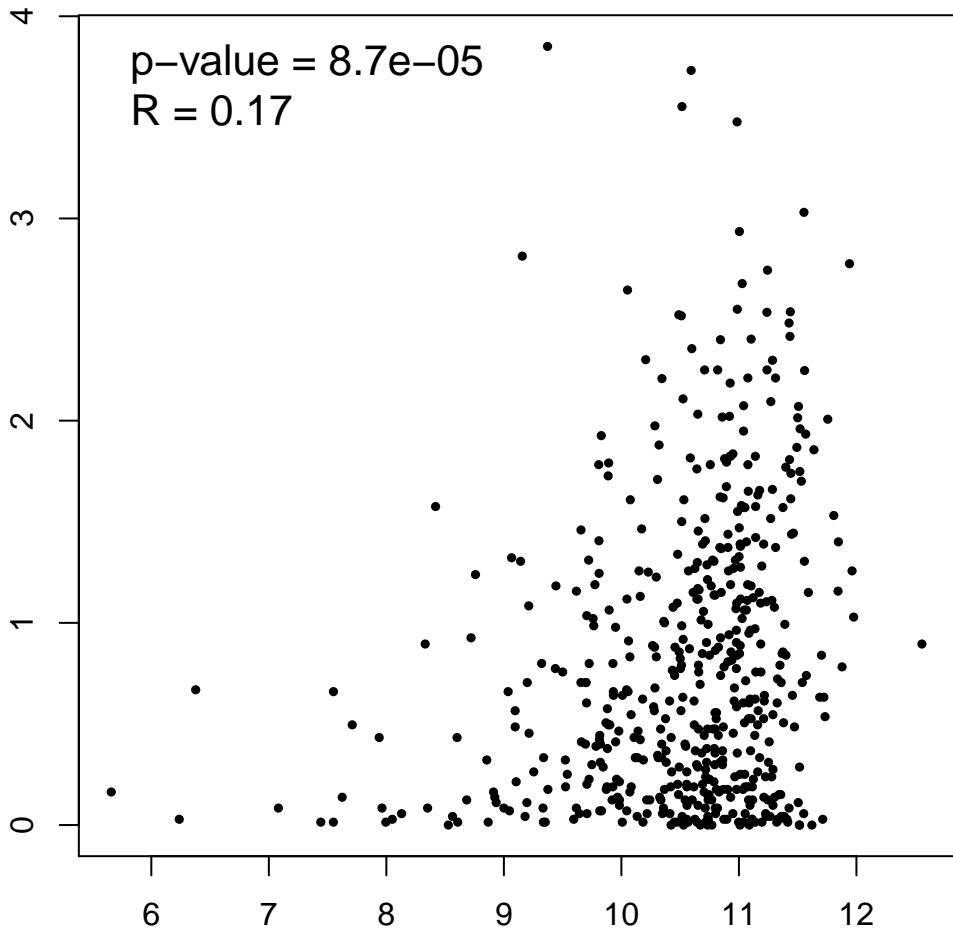

log2(LDHA TPM)

Supplement: uncropped_blot.zip [file uncropped_blot.zip]

# IGF2BP1

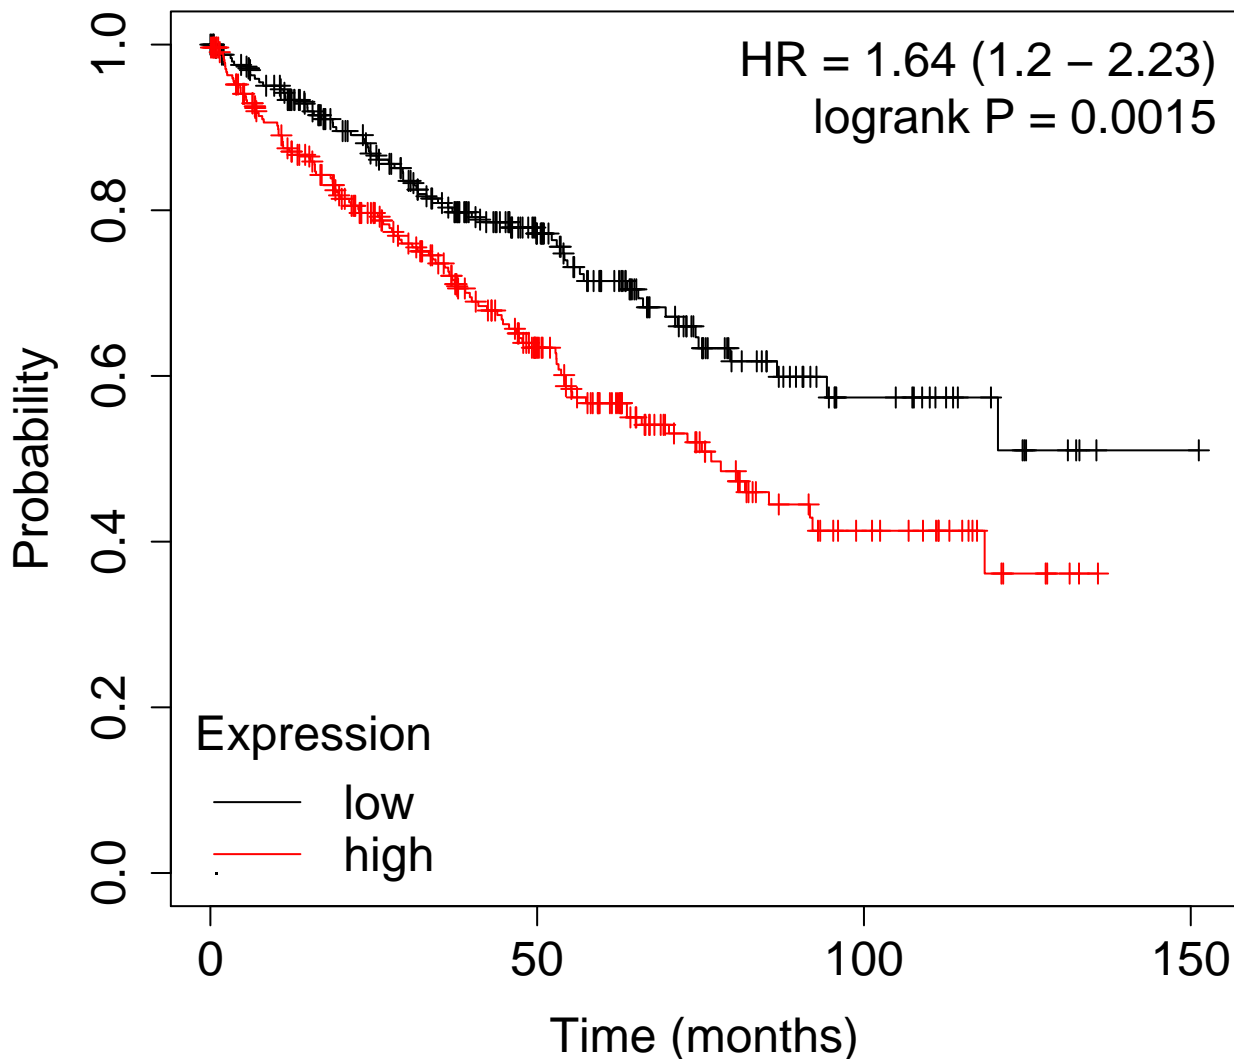

Number at risk

low  
high

252  
278

104  
102

19  
21

1  
0

Supplement: uncropped_blot.zip [file uncropped_blot.zip]

bits

2

1

0

1

2

3

4

5

6

7

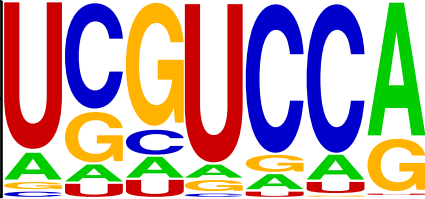

Supplement: uncropped_blot.zip [file uncropped_blot.zip]

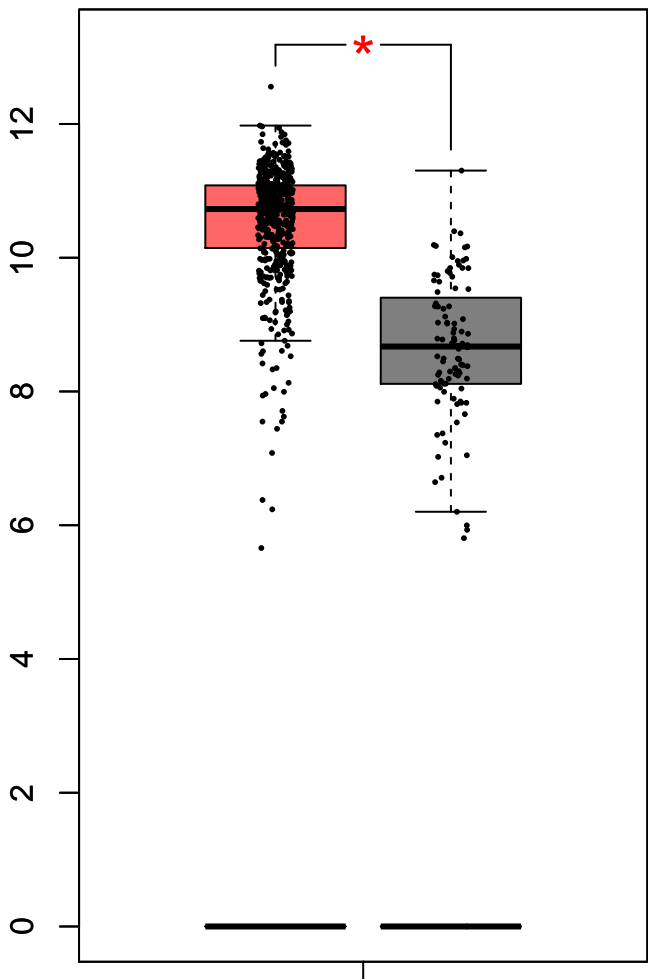

KIRC  
(num(T)=523; num(N)=100)

Supplement: uncropped_blot.zip [file uncropped_blot.zip]
